# Supplementary material
Source: Springer Nature journal article supplement (https://www.springermedizin.de/resource/supplementary/12943_2013_1168_MOESM3_ESM.pdf/9552586)
Supplement: MOESM3 [file 9552586]

## Additional file 3. GO search results

| DePreterMcArdleWilzén 12 up |            |              |
|-----------------------------|------------|--------------|
| GO-ID                       | p-value    | corr p-value |
| 7049                        | 1.8112E-35 | 1.2213E-32   |
| 279                         | 2.2046E-35 | 1.2213E-32   |
| 22403                       | 1.1612E-34 | 4.2886E-32   |
| 22402                       | 2.4998E-32 | 6.9245E-30   |
| 280                         | 3.8753E-31 | 7.1564E-29   |
| 7067                        | 3.8753E-31 | 7.1564E-29   |
| 87                          | 9.7333E-31 | 1.5406E-28   |
| 48285                       | 1.2594E-30 | 1.7443E-28   |
| 278                         | 6.4166E-30 | 7.8995E-28   |
| 51301                       | 4.0184E-27 | 4.4523E-25   |

## DePreterMcArdleWilzén 13 up

| GO-ID | p-value    | corr p-value | Description                                  |
|-------|------------|--------------|----------------------------------------------|
| 7049  | 1.7440E-31 | 3.1549E-28   | cell cycle                                   |
| 22403 | 4.5553E-30 | 4.1203E-27   | cell cycle phase                             |
| 278   | 1.1321E-29 | 6.8266E-27   | mitotic cell cycle                           |
| 280   | 1.4262E-28 | 5.1599E-26   | nuclear division                             |
| 7067  | 1.4262E-28 | 5.1599E-26   | mitosis                                      |
| 87    | 4.4675E-28 | 1.3470E-25   | M phase of mitotic cell cycle                |
| 279   | 5.2160E-28 | 1.3480E-25   | M phase                                      |
| 48285 | 6.1464E-28 | 1.3899E-25   | organelle fission                            |
| 22402 | 8.1476E-28 | 1.6377E-25   | cell cycle process                           |
| 34641 | 2.0224E-22 | 3.6585E-20   | cellular nitrogen compound metabolic process |

## DePreterMcArdleWilzén 14 up

| GO-ID | p-value    | corr p-value | Description                               |
|-------|------------|--------------|-------------------------------------------|
| 48731 | 1.9103E-12 | 4.1168E-9    | system development                        |
| 48856 | 1.4247E-11 | 1.5352E-8    | anatomical structure development          |
| 7275  | 2.2730E-11 | 1.6328E-8    | multicellular organismal development      |
| 22008 | 4.2232E-11 | 1.9176E-8    | neurogenesis                              |
| 9611  | 4.4492E-11 | 1.9176E-8    | response to wounding                      |
| 32502 | 1.0767E-9  | 3.7074E-7    | developmental process                     |
| 48518 | 1.2043E-9  | 3.7074E-7    | positive regulation of biological process |
| 7399  | 2.5337E-9  | 6.8253E-7    | nervous system development                |
| 32501 | 7.1736E-9  | 1.1777E-6    | multicellular organismal process          |
| 6956  | 1.1442E-8  | 2.4420E-6    | complement activation                     |

## DePreterMcArdleWilzén 23 up

| GO-ID | p-value   | corr p-value | Description                                              |
|-------|-----------|--------------|----------------------------------------------------------|
| 44271 | 1.6978E-5 | 1.2718E-2    | cellular nitrogen compound biosynthetic process          |
| 46112 | 3.8543E-5 | 1.2718E-2    | nucleobase biosynthetic process                          |
| 6520  | 5.0853E-5 | 1.2718E-2    | cellular amino acid metabolic process                    |
| 51656 | 5.6811E-5 | 1.2718E-2    | establishment of organelle localization                  |
| 44106 | 6.7264E-5 | 1.2718E-2    | cellular amino acid metabolic process                    |
| 6189  | 9.7126E-5 | 1.2718E-2    | 'de novo' IMP biosynthetic process                       |
| 48846 | 9.7126E-5 | 1.2718E-2    | axon extension involved in axon guidance                 |
| 6541  | 1.1669E-4 | 1.2718E-2    | glutamine metabolic process                              |
| 9168  | 1.1669E-4 | 1.2718E-2    | purine ribonucleoside monophosphate biosynthetic process |
| 9127  | 1.1669E-4 | 1.2718E-2    | purine nucleoside monophosphate biosynthetic process     |

## DePreterMcArdleWilzén 24 up

| GO-ID | p-value    | corr p-value | Description                               |
|-------|------------|--------------|-------------------------------------------|
| 48731 | 5.7794E-13 | 1.2356E-9    | system development                        |
| 48856 | 5.5341E-12 | 2.7983E-9    | anatomical structure development          |
| 7275  | 3.9265E-12 | 2.7983E-9    | multicellular organismal development      |
| 7399  | 1.7395E-11 | 9.2978E-9    | nervous system development                |
| 32502 | 1.8137E-10 | 7.7554E-8    | developmental process                     |
| 22008 | 4.1526E-10 | 1.4797E-7    | neurogenesis                              |
| 50793 | 2.1690E-9  | 6.6248E-7    | regulation of developmental process       |
| 48518 | 1.1481E-8  | 3.0684E-6    | positive regulation of biological process |
| 32501 | 1.2990E-8  | 3.0858E-6    | multicellular organismal process          |
| 48699 | 1.9981E-8  | 4.2720E-6    | generation of neurons                     |

## DePreterMcArdleWilzén 34 up

| GO-ID | p-value    | corr p-value | Description                                                           |
|-------|------------|--------------|-----------------------------------------------------------------------|
| 48731 | 2.0111E-12 | 4.4909E-9    | system development                                                    |
| 7275  | 7.8278E-12 | 8.7398E-9    | multicellular organismal development                                  |
| 48856 | 2.0158E-11 | 1.5004E-8    | anatomical structure development                                      |
| 32502 | 5.1079E-10 | 2.8515E-7    | developmental process                                                 |
| 32501 | 2.8380E-9  | 1.2675E-6    | multicellular organismal process                                      |
| 9611  | 2.4557E-8  | 9.1392E-6    | response to wounding                                                  |
| 23052 | 5.3640E-8  | 1.7113E-5    | signaling                                                             |
| 6959  | 9.4924E-8  | 2.6496E-5    | humoral immune response                                               |
| 6956  | 3.8381E-7  | 9.5226E-5    | complement activation                                                 |
| 2541  | 4.6967E-7  | 9.9155E-5    | activation of plasma proteins involved in acute inflammatory response |

## Wang 12 up

| GO-ID | p-value    | corr p-value | Description                                          |
|-------|------------|--------------|------------------------------------------------------|
| 6334  | 1.0645E-39 | 3.0371E-36   | nucleosome assembly                                  |
| 65004 | 4.6799E-39 | 6.6758E-36   | protein-DNA complex assembly                         |
| 31497 | 8.5573E-39 | 8.1380E-36   | chromatin assembly                                   |
| 6323  | 6.8053E-38 | 4.8539E-35   | DNA packaging                                        |
| 34728 | 1.6113E-37 | 9.1942E-35   | nucleosome organization                              |
| 71103 | 5.1944E-37 | 2.4723E-34   | DNA conformation change                              |
| 6333  | 5.3465E-34 | 2.1791E-31   | chromatin assembly or disassembly                    |
| 34622 | 6.1973E-32 | 2.2101E-29   | cellular macromolecule complex assembly              |
| 34621 | 1.7800E-31 | 5.6425E-29   | cellular macromolecular complex subunit organization |
| 9987  | 3.2750E-31 | 9.3434E-29   | cellular process                                     |

## Wang 13 up

| GO-ID | p-value    | corr p-value | Description                                                           |
|-------|------------|--------------|-----------------------------------------------------------------------|
| 44237 | 1.1533E-40 | 2.8129E-37   | cellular metabolic process                                            |
| 6139  | 1.6662E-38 | 2.0320E-35   | nucleobase, nucleoside, nucleotide and nucleic acid metabolic process |
| 44260 | 7.8058E-37 | 6.3461E-34   | cellular macromolecule metabolic process                              |
| 34641 | 1.0993E-35 | 8.8270E-33   | cellular nitrogen compound metabolic process                          |
| 90304 | 1.1946E-35 | 8.8270E-33   | nucleic acid metabolic process                                        |
| 6807  | 1.2493E-33 | 5.0782E-31   | nitrogen compound metabolic process                                   |
| 44238 | 3.6841E-31 | 1.2837E-28   | primary metabolic process                                             |
| 34645 | 4.2481E-30 | 7.4025E-28   | cellular macromolecule biosynthetic process                           |
| 9059  | 1.4895E-29 | 4.0364E-27   | macromolecule biosynthetic process                                    |
| 44249 | 2.6682E-29 | 6.5077E-27   | cellular biosynthetic process                                         |

## Wang 14 up

| GO-ID | p-value    | corr p-value | Description                                              |
|-------|------------|--------------|----------------------------------------------------------|
| 9611  | 1.1549E-15 | 3.6160E-12   | response to wounding                                     |
| 6950  | 6.0543E-15 | 9.4781E-12   | response to stress                                       |
| 2376  | 2.1914E-12 | 2.0662E-9    | immune system process                                    |
| 50896 | 2.6396E-12 | 2.0662E-9    | response to stimulus                                     |
| 42060 | 1.5046E-11 | 9.4215E-9    | wound healing                                            |
| 22603 | 1.9016E-11 | 9.9234E-9    | regulation of anatomical structure morphogenesis         |
| 51239 | 3.2850E-11 | 1.4693E-8    | regulation of multicellular organismal process           |
| 48518 | 4.6879E-11 | 1.8347E-8    | positive regulation of biological process                |
| 48646 | 5.5512E-11 | 1.9312E-8    | anatomical structure formation involved in morphogenesis |
| 23052 | 7.9009E-11 | 2.4738E-8    | signaling                                                |

## Wang 23 up

| GO-ID | p-value    | corr p-value | Description                                                           |
|-------|------------|--------------|-----------------------------------------------------------------------|
| 10467 | 6.6449E-36 | 1.6373E-32   | gene expression                                                       |
| 6139  | 4.4919E-31 | 5.5341E-28   | nucleobase, nucleoside, nucleotide and nucleic acid metabolic process |
| 44237 | 3.9845E-31 | 7.1159E-28   | cellular metabolic process                                            |
| 34641 | 1.1552E-30 | 7.1159E-28   | cellular nitrogen compound metabolic process                          |
| 6807  | 2.1200E-29 | 1.0447E-26   | nitrogen compound metabolic process                                   |
| 6412  | 1.2095E-27 | 4.9672E-25   | translation                                                           |
| 44260 | 2.2270E-26 | 7.8390E-24   | cellular macromolecule metabolic process                              |
| 6414  | 9.3140E-26 | 2.8687E-23   | translational elongation                                              |
| 44238 | 1.1535E-25 | 3.1581E-23   | primary metabolic process                                             |
| 90304 | 7.1899E-25 | 1.7716E-22   | nucleic acid metabolic process                                        |

## DePreterMcArdleWilzén 12 down

Not available

## DePreterMcArdleWilzén 13 down

| GO-ID | p-value    | corr p-value | Description                   |
|-------|------------|--------------|-------------------------------|
| 51179 | 3.4144E-10 | 6.2040E-7    | localization                  |
| 7399  | 2.5524E-9  | 2.3189E-6    | nervous system development    |
| 7611  | 1.5149E-8  | 8.4301E-6    | learning or memory            |
| 23052 | 2.1684E-8  | 8.4301E-6    | signaling                     |
| 51234 | 2.8496E-8  | 8.4301E-6    | establishment of localization |
| 23060 | 3.2477E-8  | 8.4301E-6    | signal transmission           |
| 23046 | 3.2477E-8  | 8.4301E-6    | signaling process             |
| 6810  | 3.8549E-8  | 8.754E-6     | transport                     |
| 6836  | 5.2482E-7  | 1.0596E-4    | neurotransmitter transport    |
| 7613  | 3.8893E-6  | 7.0668E-4    | memory                        |

## DePreterMcArdleWilzén 14 down

| GO-ID | p-value   | corr p-value | Description                                  |
|-------|-----------|--------------|----------------------------------------------|
| 7399  | 3.7004E-7 | 6.0761E-4    | nervous system development                   |
| 9394  | 1.1724E-5 | 9.5552E-3    | 2-deoxyribonucleotide metabolic process      |
| 42423 | 2.1576E-5 | 9.5552E-3    | catecholamine biosynthetic process           |
| 1764  | 2.3277E-5 | 9.5552E-3    | neuron migration                             |
| 9262  | 4.3249E-5 | 1.4203E-2    | deoxyribonucleotide metabolic process        |
| 48699 | 7.6800E-5 | 1.6888E-2    | generation of neurons                        |
| 22008 | 7.7181E-5 | 1.6888E-2    | neurogenesis                                 |
| 51234 | 9.7585E-6 | 2.5714E-3    | multicellular organismal development         |
| 32502 | 1.1320E-4 | 2.0652E-2    | developmental process                        |
| 34641 | 1.6387E-4 | 2.6907E-2    | cellular nitrogen compound metabolic process |

## DePreterMcArdleWilzén 23 down

| GO-ID | p-value   | corr p-value | Description                          |
|-------|-----------|--------------|--------------------------------------|
| 23052 | 2.6014E-8 | 4.1129E-5    | signaling                            |
| 51179 | 8.0248E-8 | 6.3733E-5    | localization                         |
| 23060 | 4.5728E-6 | 1.8074E-3    | signal transmission                  |
| 23046 | 4.5728E-6 | 1.8074E-3    | signaling process                    |
| 6810  | 6.7623E-6 | 2.1382E-3    | transport                            |
| 32502 | 9.7585E-6 | 2.5714E-3    | establishment of localization        |
| 32501 | 1.6497E-5 | 3.7260E-3    | developmental process                |
| 16265 | 2.4730E-5 | 3.9237E-3    | death                                |
| 7399  | 2.9299E-5 | 3.9237E-3    | nervous system development           |
| 7275  | 3.1726E-5 | 3.9237E-3    | multicellular organismal development |

## DePreterMcArdleWilzén 24 down

| GO-ID | p-value    | corr p-value | Description                   |
|-------|------------|--------------|-------------------------------|
| 22403 | 6.1947E-20 | 6.3442E-17   | cell cycle phase              |
| 7049  | 7.1244E-20 | 6.3442E-17   | cell cycle                    |
| 278   | 1.2891E-18 | 7.6531E-16   | mitotic cell cycle            |
| 279   | 5.3884E-18 | 1.7419E-15   | M phase                       |
| 280   | 5.8684E-18 | 1.7419E-15   | nuclear division              |
| 7067  | 5.8684E-18 | 1.7419E-15   | mitosis                       |
| 87    | 1.3733E-17 | 3.4459E-15   | M phase of mitotic cell cycle |
| 22402 | 1.6534E-17 | 3.4459E-15   | cell cycle process            |
| 48285 | 1.7413E-17 | 3.4459E-15   | organelle fission             |
| 51301 | 5.7542E-16 | 1.0248E-13   | cell division                 |

## DePreterMcArdleWilzén 34 down

| GO-ID | p-value    | corr p-value | Description                                                           |
|-------|------------|--------------|-----------------------------------------------------------------------|
| 6139  | 9.4150E-36 | 1.8030E-32   | nucleobase, nucleoside, nucleotide and nucleic acid metabolic process |
| 90304 | 1.7313E-33 | 1.6577E-30   | nucleic acid metabolic process                                        |
| 34641 | 2.6155E-33 | 1.6696E-30   | cellular nitrogen compound metabolic process                          |
| 6807  | 2.4146E-31 | 1.1560E-28   | nitrogen compound metabolic process                                   |
| 44260 | 9.7791E-24 | 3.7454E-21   | cellular macromolecule metabolic process                              |
| 6260  | 5.2066E-21 | 1.1661E-18   | DNA replication                                                       |
| 6259  | 3.8638E-20 | 1.0319E-17   | DNA metabolic process                                                 |
| 7049  | 4.3110E-20 | 1.0319E-17   | cell cycle                                                            |
| 44237 | 9.3551E-20 | 1.9906E-17   | cellular metabolic process                                            |
| 43170 | 1.9474E-19 | 3.7292E-17   | macromolecule metabolic process                                       |

## Wang 12 down

| GO-ID | p-value    | corr p-value | Description                                                                                  |
|-------|------------|--------------|----------------------------------------------------------------------------------------------|
| 7156  | 1.8517E-13 | 4.5847E-10   | homophilic cell adhesion                                                                     |
| 9987  | 3.0998E-8  | 3.8375E-5    | cellular process                                                                             |
| 16337 | 1.6178E-7  | 1.3352E-4    | cell-cell adhesion                                                                           |
| 48523 | 5.7651E-7  | 3.3702E-4    | negative regulation of cellular process                                                      |
| 6464  | 8.0529E-7  | 3.3702E-4    | protein modification process                                                                 |
| 45941 | 9.3830E-7  | 3.3702E-4    | positive regulation of transcription                                                         |
| 42147 | 1.0801E-6  | 3.3702E-4    | retrograde transport, endosome to Golgi                                                      |
| 43687 | 1.0889E-6  | 3.3702E-4    | post-translational protein modification                                                      |
| 10628 | 3.1218E-6  | 8.5883E-4    | positive regulation of gene expression                                                       |
| 45935 | 4.5382E-6  | 1.0360E-3    | positive regulation of nucleobase, nucleoside, nucleotide and nucleic acid metabolic process |

## Wang 13 down

| GO-ID | p-value    | corr p-value | Description                                                                               |
|-------|------------|--------------|-------------------------------------------------------------------------------------------|
| 7156  | 1.7530E-21 | 5.0206E-18   | homophilic cell adhesion                                                                  |
| 16337 | 1.0892E-16 | 1.5597E-13   | cell-cell adhesion                                                                        |
| 19882 | 2.0881E-15 | 1.9925E-12   | antigen processing and presentation                                                       |
| 2504  | 2.3547E-14 | 1.6860E-11   | antigen processing and presentation of peptide or polysaccharide antigen via MHC class II |
| 23052 | 2.1435E-12 | 1.2278E-9    | signaling                                                                                 |
| 23060 | 2.9191E-11 | 1.1943E-8    | signal transmission                                                                       |
| 23046 | 2.9191E-11 | 1.1943E-8    | signaling process                                                                         |
| 7155  | 1.6473E-10 | 5.5369E-8    | cell adhesion                                                                             |
| 51276 | 1.7285E-23 | 5.4137E-21   | chromosome organization                                                                   |
| 19219 | 1.9139E-23 | 5.4137E-21   | regulation of nucleobase, nucleoside, nucleotide and nucleic acid metabolic process       |
| 19222 | 2.0585E-23 |              |                                                                                           |

## Wang 24 up

| GO-ID | p-value    | corr p-value | Description                               |
|-------|------------|--------------|-------------------------------------------|
| 48518 | 7.4800E-15 | 2.3053E-11   | positive regulation of biological process |
| 9611  | 2.9007E-13 | 3.2089E-10   | response to wounding                      |
| 23052 | 3.1235E-13 | 3.2089E-10   | signaling                                 |
| 42221 | 6.2468E-13 | 4.8131E-10   | response to chemical stimulus             |
| 10033 | 1.6211E-12 | 9.9925E-10   | response to organic substance             |
| 2376  | 3.1964E-11 | 1.5976E-8    | immune system process                     |
| 48731 | 3.8947E-11 | 1.5976E-8    | system development                        |
| 50793 | 4.3898E-11 | 1.5976E-8    | regulation of developmental process       |
| 48522 | 4.6652E-11 | 1.5976E-8    | positive regulation of cellular process   |
| 65007 | 5.5263E-11 | 1.7032E-8    | biological regulation                     |

## Wang 34 up

| GO-ID | p-value    | corr p-value | Description                                                                               |
|-------|------------|--------------|-------------------------------------------------------------------------------------------|
| 2376  | 8.2047E-21 | 2.4795E-17   | immune system process                                                                     |
| 19882 | 2.7820E-19 | 4.2035E-16   | antigen processing and presentation                                                       |
| 6955  | 4.7667E-19 | 4.8017E-16   | immune response                                                                           |
| 50896 | 3.7900E-17 | 2.8634E-14   | response to stimulus                                                                      |
| 2504  | 1.0062E-12 | 6.0816E-10   | antigen processing and presentation of peptide or polysaccharide antigen via MHC class II |
| 23052 | 1.7885E-12 | 9.0083E-10   | signaling                                                                                 |
| 9611  | 1.0776E-12 | 2.7651E-9    | response to wounding                                                                      |
| 6950  | 7.3201E-12 | 2.7651E-9    | response to stress                                                                        |
| 48518 | 8.8506E-12 | 2.9718E-9    | positive regulation of biological process                                                 |
| 42221 | 2.8293E-11 | 8.5500E-9    | response to chemical stimulus                                                             |

## Versteeg NB-GN up

| GO-ID | p-value    | corr p-value | Description                                    |
|-------|------------|--------------|------------------------------------------------|
| 23052 | 2.0379E-12 | 5.4454E-9    | signaling                                      |
| 23060 | 2.8975E-10 | 2.5807E-7    | signal transduction                            |
| 23046 | 2.8975E-10 | 2.5807E-7    | signaling process                              |
| 48731 | 8.8133E-10 | 5.8437E-7    | system development                             |
| 7399  | 1.0935E-9  | 5.8437E-7    | nervous system development                     |
| 7275  | 2.6000E-9  | 1.1579E-6    | multicellular organismal development           |
| 48856 | 3.6539E-9  | 1.3947E-6    | anatomical structure development               |
| 51239 | 4.4860E-9  | 1.4983E-6    | regulation of multicellular organismal process |
| 50793 | 2.0626E-8  | 6.1235E-6    | regulation of developmental process            |
| 32502 | 2.6964E-8  | 7.2048E-6    | developmental process                          |

## Versteeg NB-GNB up

| GO-ID | p-value   | corr p-value | Description                                                 |
|-------|-----------|--------------|-------------------------------------------------------------|
| 7267  | 4.3871E-6 | 1.0871E-2    | cell-cell signaling                                         |
| 7154  | 1.1659E-5 | 1.3090E-2    | cell communication                                          |
| 90032 | 2.2458E-5 | 1.3090E-2    | negative regulation of steroid hormone biosynthetic process |
| 7268  | 2.4302E-5 | 1.3090E-2    | synaptic transmission                                       |
| 44057 | 2.9470E-5 | 1.3090E-2    | regulation of system process                                |
| 23052 | 3.1696E-5 | 1.3090E-2    | signaling                                                   |
| 51969 | 3.9451E-5 | 1.3966E-2    | regulation of transmission of nerve impulse                 |
| 47496 | 7.0953E-5 | 1.6762E-2    | vesicle transport along microtubule                         |
| 50804 | 7.3703E-5 | 1.6762E-2    | regulation of synaptic transmission                         |
| 30641 | 8.2456E-5 | 1.6762E-2    | regulation of cellular pH                                   |

## Versteeg GNB-GN up

| GO-ID | p-value   | corr p-value | Description                                        |
|-------|-----------|--------------|----------------------------------------------------|
| 10627 | 1.0329E-7 | 2.7280E-4    | regulation of intracellular protein kinase cascade |
| 23033 | 9.7516E-7 | 7.9084E-4    | signaling pathway                                  |
| 7165  | 1.1828E-6 | 7.9084E-4    | signal transduction                                |
| 35556 | 1.1978E-6 | 7.9084E-4    | intracellular signal transduction                  |
| 23052 | 2.2404E-6 | 1.0688E-3    | signaling                                          |
| 23060 | 2.9144E-6 | 1.0688E-3    | signal transduction                                |
| 23046 | 2.9144E-6 | 1.0688E-3    | signaling process                                  |
| 23014 | 3.6422E-6 | 1.0688E-3    | signal transduction via phosphorylation event      |
| 7243  | 3.6422E-6 | 1.0688E-3    | intracellular protein kinase cascade               |
| 7259  | 4.9701E-6 | 1.3126E-3    | JAK-STAT cascade                                   |

## Wang 24 down

| GO-ID | p-value    | corr p-value | Description                                                           |
|-------|------------|--------------|-----------------------------------------------------------------------|
| 51276 | 4.6709E-34 | 5.1310E-31   | chromosome organization                                               |
| 7049  | 1.4280E-33 | 1.0458E-30   | cell cycle                                                            |
| 22403 | 2.9992E-33 | 1.6473E-30   | cell cycle phase                                                      |
| 6996  | 7.3401E-33 | 3.2253E-30   | organelle organization                                                |
| 6259  | 2.7661E-31 | 1.0129E-28   | DNA metabolic process                                                 |
| 278   | 3.3646E-30 | 1.0560E-27   | mitotic cell cycle                                                    |
| 6139  | 4.2957E-30 | 1.1797E-27   | nucleobase, nucleoside, nucleotide and nucleic acid metabolic process |
| 279   | 1.1182E-29 | 2.7297E-27   | M phase                                                               |
| 22402 | 1.5275E-28 | 3.3559E-26   | cell cycle process                                                    |

## Wang 34 down

| GO-ID | p-value    | corr p-value | Description                                                           |
|-------|------------|--------------|-----------------------------------------------------------------------|
| 90304 | 3.7432E-35 | 8.2237E-32   | nucleic acid metabolic process                                        |
| 6139  | 1.7034E-63 | 1.8670E-60   | nucleobase, nucleoside, nucleotide and nucleic acid metabolic process |
| 34641 | 5.6746E-55 | 4.1463E-52   | cellular nitrogen compound metabolic process                          |
| 44260 | 3.0141E-54 | 1.6517E-51   | cellular macromolecule metabolic process                              |
| 6807  | 7.0009E-51 | 3.0692E-48   | nitrogen compound metabolic process                                   |
| 43170 | 5.1546E-43 | 1.8831E-40   | macromolecule metabolic process                                       |
| 6259  | 2.8942E-40 | 9.0629E-38   | DNA metabolic process                                                 |
| 44237 | 1.5683E-39 | 4.2971E-37   | cellular metabolic process                                            |
| 22403 | 1.7314E-37 | 4.2170E-35   | cell cycle phase                                                      |
| 10467 | 1.2676E-36 | 2.7786E-34   | gene expression                                                       |

## Versteeg NB-GN down

| GO-ID | p-value    | corr p-value | Description                   |
|-------|------------|--------------|-------------------------------|
| 279   | 1.0202E-40 | 2.0128E-37   | M phase                       |
| 22403 | 1.6713E-39 | 1.6487E-36   | cell cycle phase              |
| 87    | 8.8385E-37 | 5.8128E-34   | M phase of mitotic cell cycle |
| 51301 | 1.9525E-36 | 9.6440E-34   | cell division                 |
| 7049  | 5.4729E-36 | 2.1596E-33   | cell cycle                    |
| 280   | 3.1111E-35 | 8.7690E-33   | nuclear division              |
| 7067  | 3.1111E-35 | 8.7690E-33   | mitosis                       |
| 22402 | 2.3357E-34 | 5.2401E-32   | cell cycle process            |
| 48285 | 2.3903E-34 | 5.2401E-32   | organelle fission             |
| 278   | 1.4824E-33 | 2.9249E-31   | mitotic cell cycle            |

## Versteeg NB-GNB down

| GO-ID | p-value    | corr p-value | Description                   |
|-------|------------|--------------|-------------------------------|
| 279   | 5.3155E-41 | 9.9878E-38   | M phase                       |
| 22403 | 2.2877E-40 | 2.1493E-37   | cell cycle phase              |
| 51301 | 4.3424E-39 | 2.6917E-36   | cell division                 |
| 87    | 5.7301E-39 | 2.6917E-36   | M phase of mitotic cell cycle |
| 280   | 1.7270E-37 | 5.4085E-35   | nuclear division              |
| 7067  | 1.7270E-37 | 5.4085E-35   | mitosis                       |
| 7049  | 3.8771E-37 | 1.0407E-34   | cell cycle                    |
| 278   | 9.8637E-37 | 2.3167E-34   | mitotic cell cycle            |
| 48285 | 1.5826E-36 | 3.3040E-34   | organelle fission             |
| 22402 | 1.0873E-34 | 2.0431E-32   | cell cycle process            |

## Versteeg GNB-GN down

| GO-ID | p-value   | corr p-value | Description                           |
|-------|-----------|--------------|---------------------------------------|
| 7268  | 3.1378E-8 | 6.7808E-5    | synaptic transmission                 |
| 19226 | 7.3869E-8 | 7.9815E-5    | transmission of nerve impulse         |
| 1505  | 1.4180E-7 | 1.0214E-4    | regulation of neurotransmitter levels |
| 7611  | 1.2044E-6 | 5.7590E-4    | learning or memory                    |
| 6836  | 1.3325E-6 | 5.7590E-4    | neurotransmitter transport            |
| 6810  | 2.3340E-6 | 8.4062E-4    | transport                             |
| 51234 | 4.2605E-6 | 1.3153E-3    | establishment of localization         |
| 7612  | 1.1774E-5 | 2.9652E-3    | learning                              |
| 51179 | 1.3631E-5 | 2.9652E-3    | localization                          |
| 48489 | 1.3721E-5 | 2.9652E-3    | synaptic vesicle transport            |

The Biological Networks Gene Ontology tool (BNGO) in Cytoscape was utilized to map the predominant functional themes of the SAM gene lists. The 10 most significant Gene Ontology (GO) from terms in each SAM comparison are presented. Gene lists are divided into three data sets, data set 1 & 2 (DePreterMcArdleWilzén), data set 3 (Wang), data set 4 (Versteeg), and into two differential expression directions; "up" or "down". GO-ID: Gene Ontology identification number, p-val: p-value, corr p-val: corrected p-value, Description: Description of the gene ontology theme. The "DePreterMcArdleWilzén\_12\_down" list was too short (22 genes) to enable the GO term search.
